# Supplementary material for: Optical Genome Mapping: A Promising New Tool to Assess Genomic Complexity in Chronic Lymphocytic Leukemia (CLL)
Source: MDPI journal article supplement (doi:10.3390/cancers14143376), 2022-07-11
Supplement: s1 [file s1]

# Optical Genome Mapping: A Promising New Tool to Assess Genomic Complexity in Chronic Lymphocytic Leukemia (CLL)

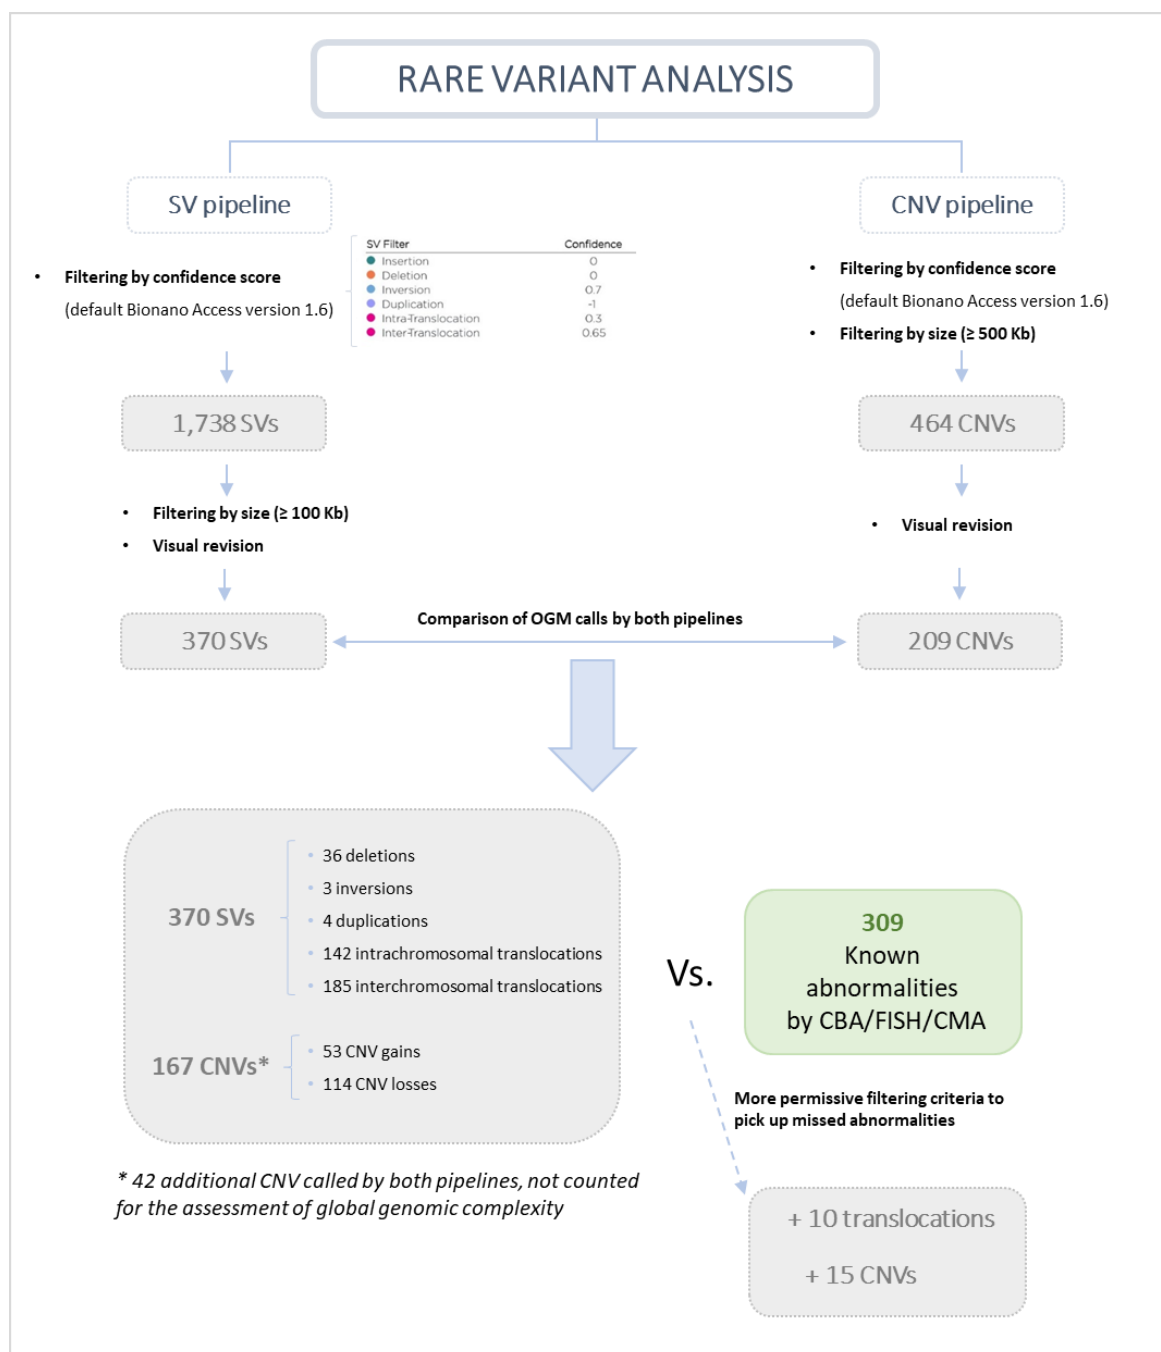

**Figure S1.** Flow diagram for filtering SVs and CNVs calls to define the final set of OGM abnormalities to be compared with standard techniques.

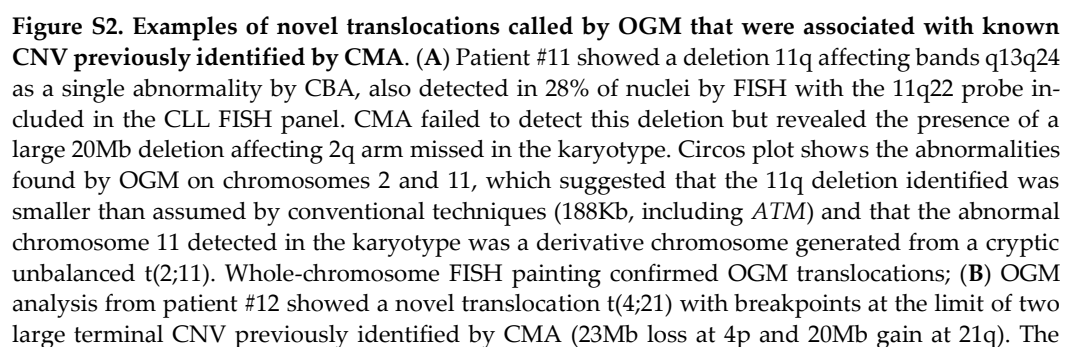

rearrangement was confirmed by FISH, which revealed the presence of an unbalanced translocation that was cryptic by CBA; Circos plots showing novel OGM translocations involving known 13q deletions detected by CMA in patient CK5 (C) and patient CK9 (D), and multiple translocations revealing the high complexity associated with a known *ATM* deletion previously underestimated in patient CK3 (E).

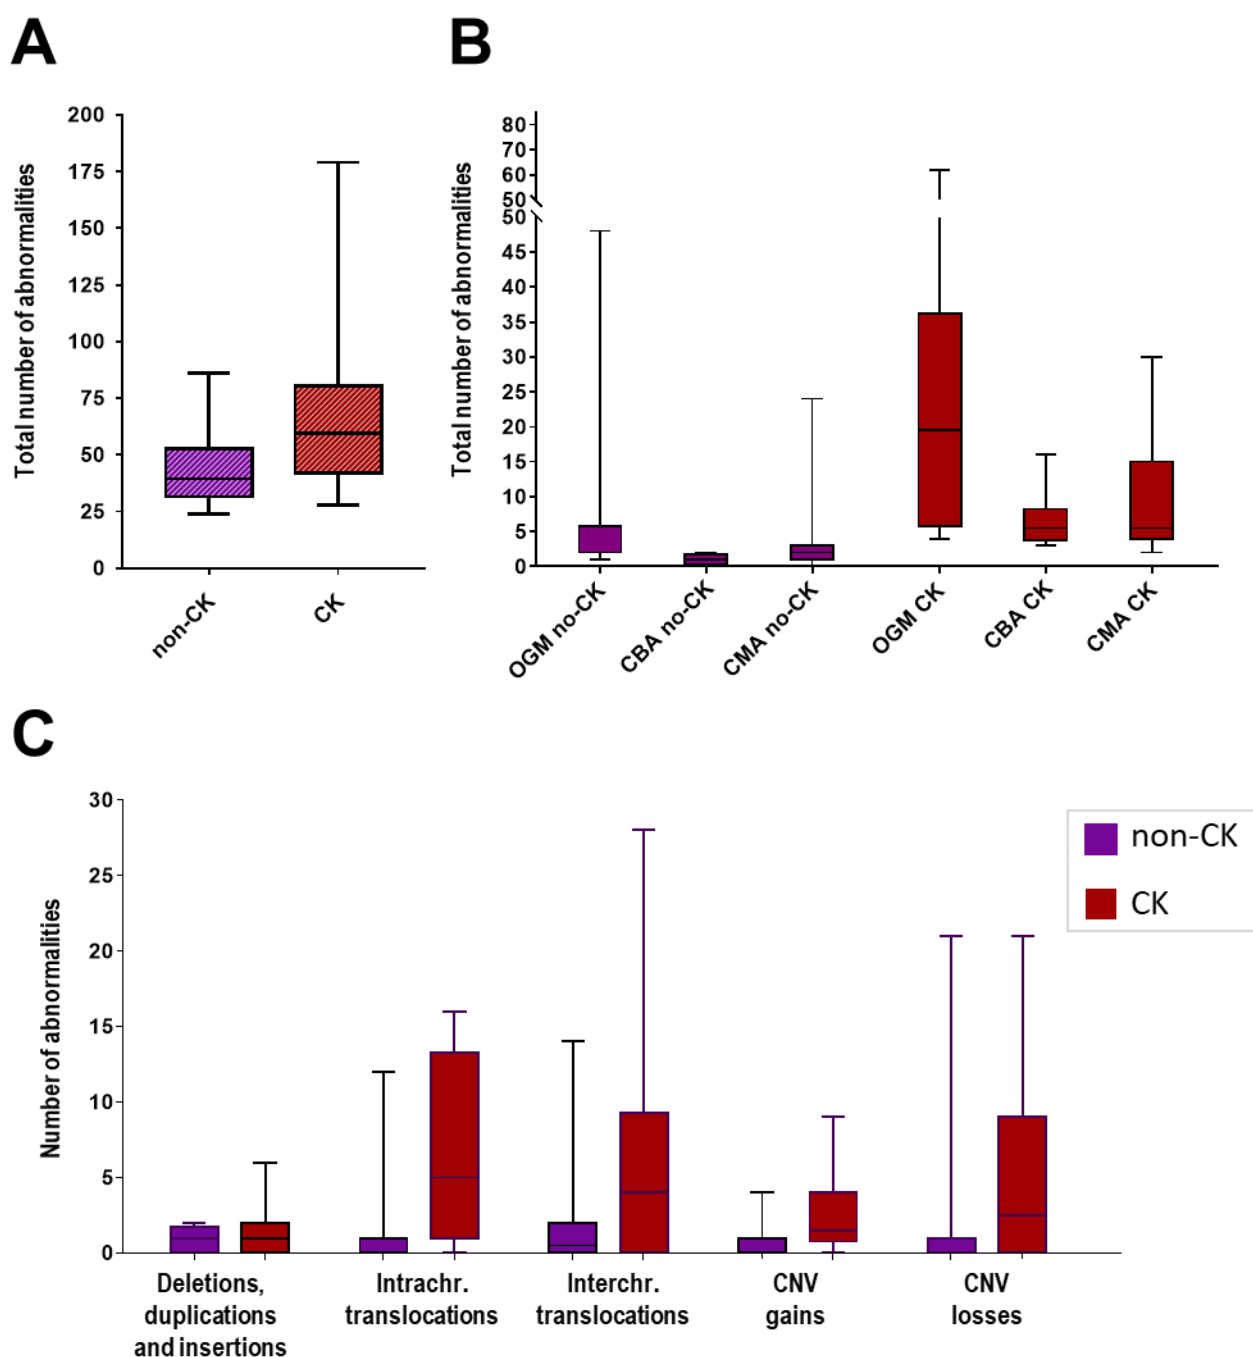

**Figure S3.** Distribution of the number of abnormalities detected in non-CK and CK groups. (A) Total number of SV and CNV called by OGM pipelines; (B) Total number of abnormalities by OGM (curated results), chromosome banding analysis (CBA) and chromosomal microarrays (CMA); (C) Distribution of the number of the different types of SV and CNV detected by OGM (curated results).

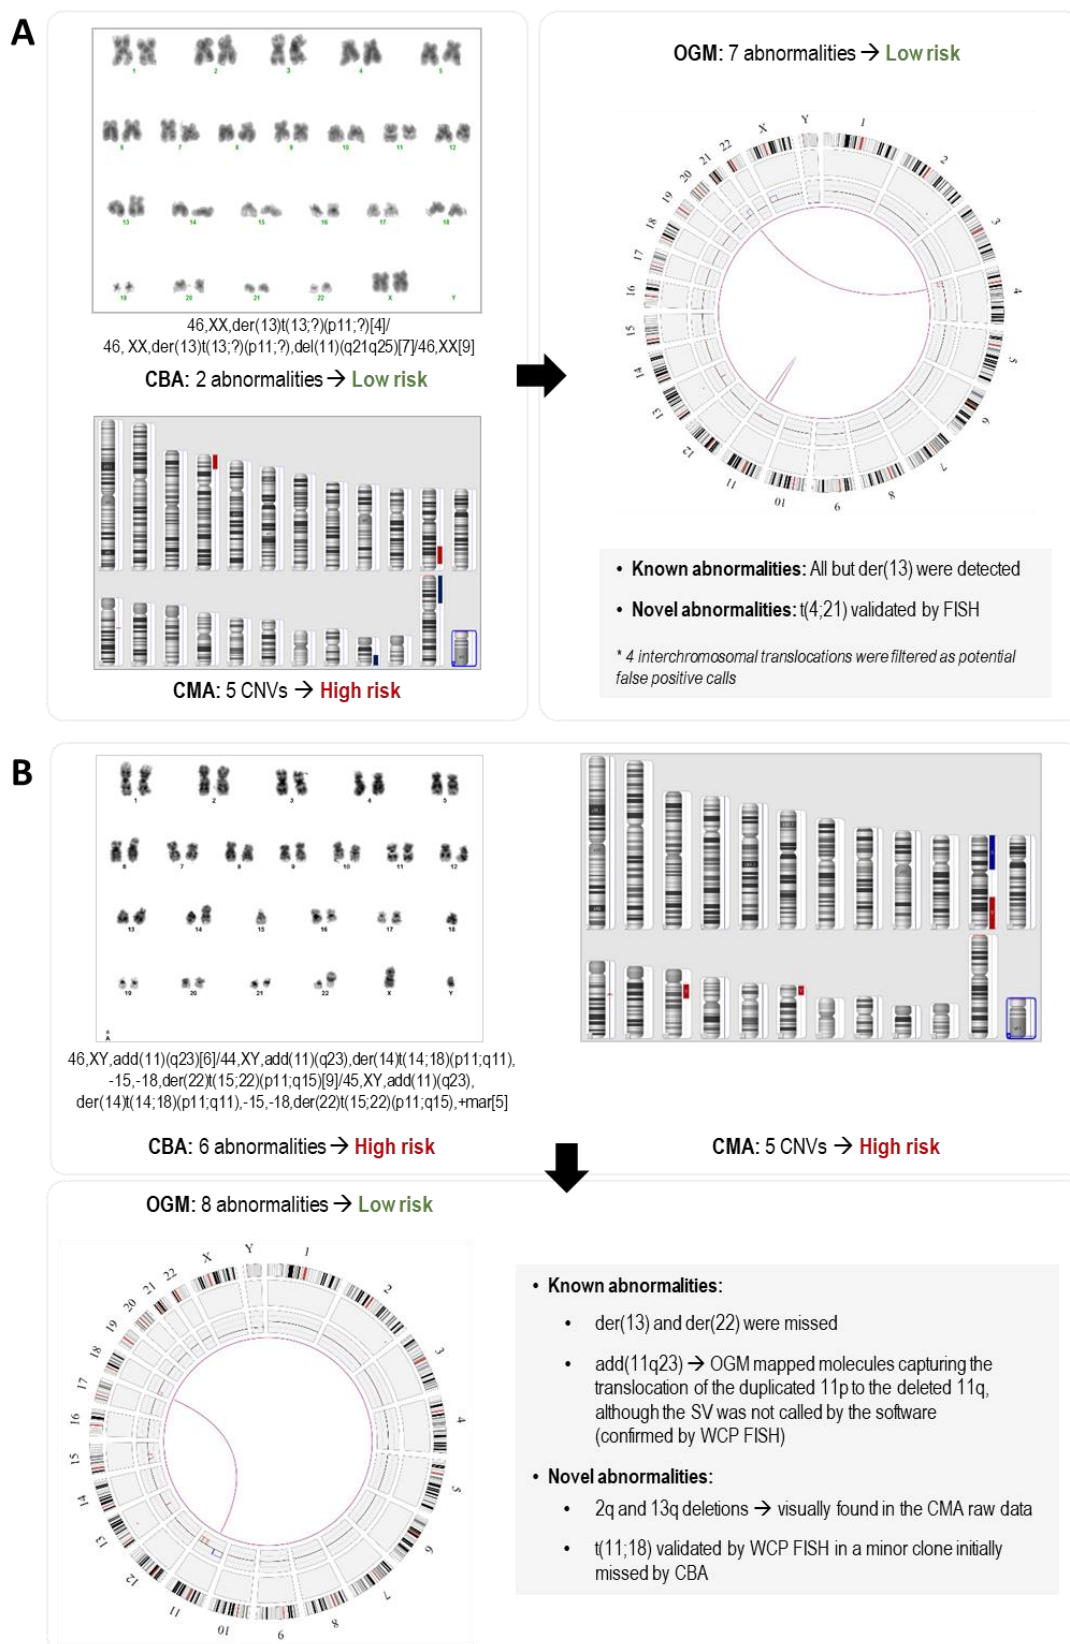

**Figure S4.** Example of two of the high-risk patients by CBA and/or CMA with less than 10 abnormalities detected by OGM. Detailed results from patient #12 (A) and #CK16 (B), who were classified in the low complexity group by OGM despite being classified in the highest risk group by at least one of the standard techniques. For each patient karyotype defined by CBA, karyogram gen-

erated by CMA and circos plots showing the curated results obtained by OGM are shown. In addition, the number of abnormalities recorded by each technique and a brief explanation of the comparison among techniques are also detailed.

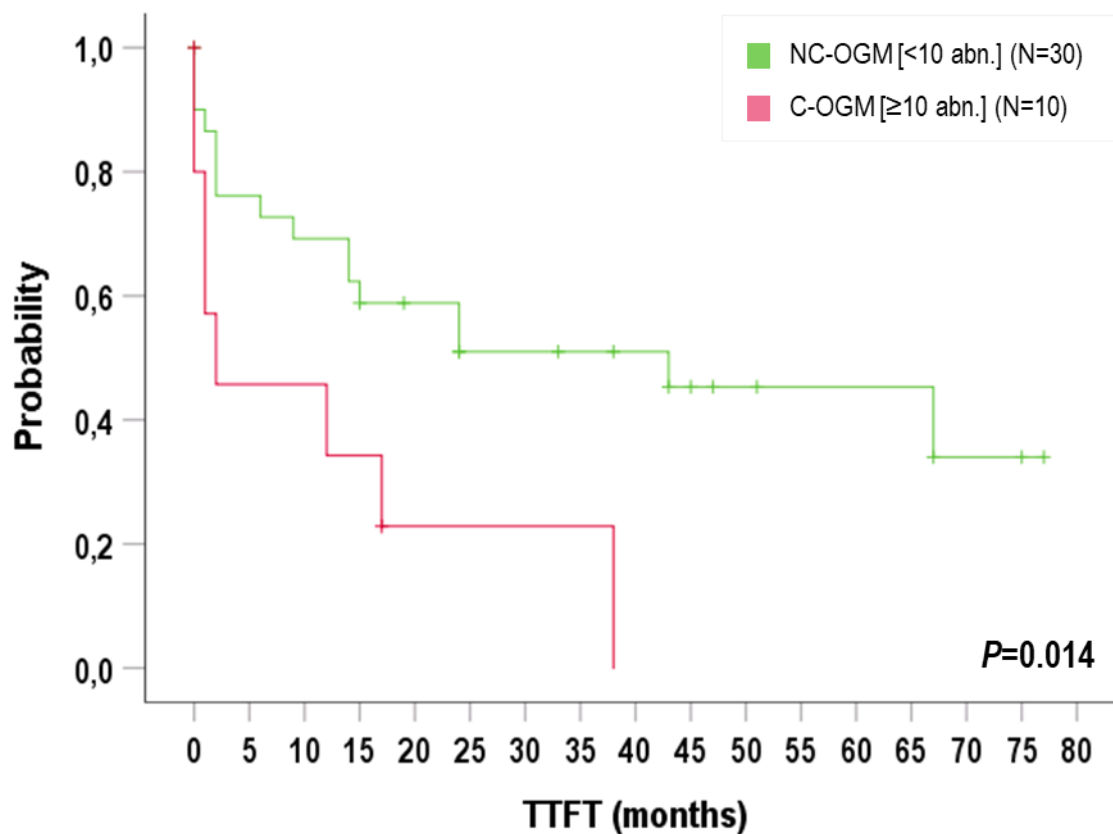

Figure S5. Kaplan-Meier plots for time to first treatment (TTFT) based on the presence of genomic complexity detected by OGM. Patients were divided in two categories based on OGM results: NC-OGM (Non-complex by OGM, <10 abnormalities) and C-OGM (Complex by OGM, ≥10 abnormalities).
